# Supplementary material for: Probing and visualizing the heterogeneity of fiber cell wall deconstruction in sugar maple (Acer saccharum) during liquid hot water pretreatment
Source: Royal Society of Chemistry journal article supplement (doi:10.1039/c6ra18333f), 2016-01-01
Supplement: c6ra18333f1.pdf [file c6ra18333f1.pdf]

## Supporting information

### Probing and visualizing the heterogeneity of fiber cell wall deconstruction in sugar maple (*acer saccharum*) during liquid hot water pretreatment

Sheng Chen,<sup>a</sup> Xun Zhang,<sup>a</sup> Zhe Ling,<sup>a</sup> Zhe Ji,<sup>b</sup> Bandaru V. Ramarao,<sup>c</sup> Shri Ramaswamy,<sup>d</sup> Feng Xu<sup>\*a</sup>

*a* Beijing Key Laboratory of Lignocellulosic Chemistry, Beijing Forestry University, Beijing 100083, China. E-mail: xfx315@bjfu.edu.cn

*b* College of Chemistry and Molecular Engineering, Qingdao University of Science and Technology, Qingdao, 266042, China

*c* Department of Paper and Bioprocess Engineering, SUNY College of Environmental Science and Forestry, Syracuse, NY 13210, USA

*d* Department of Bioproducts and Biosystems Engineering, University of Minnesota, Saint Paul, MN 55108, USA

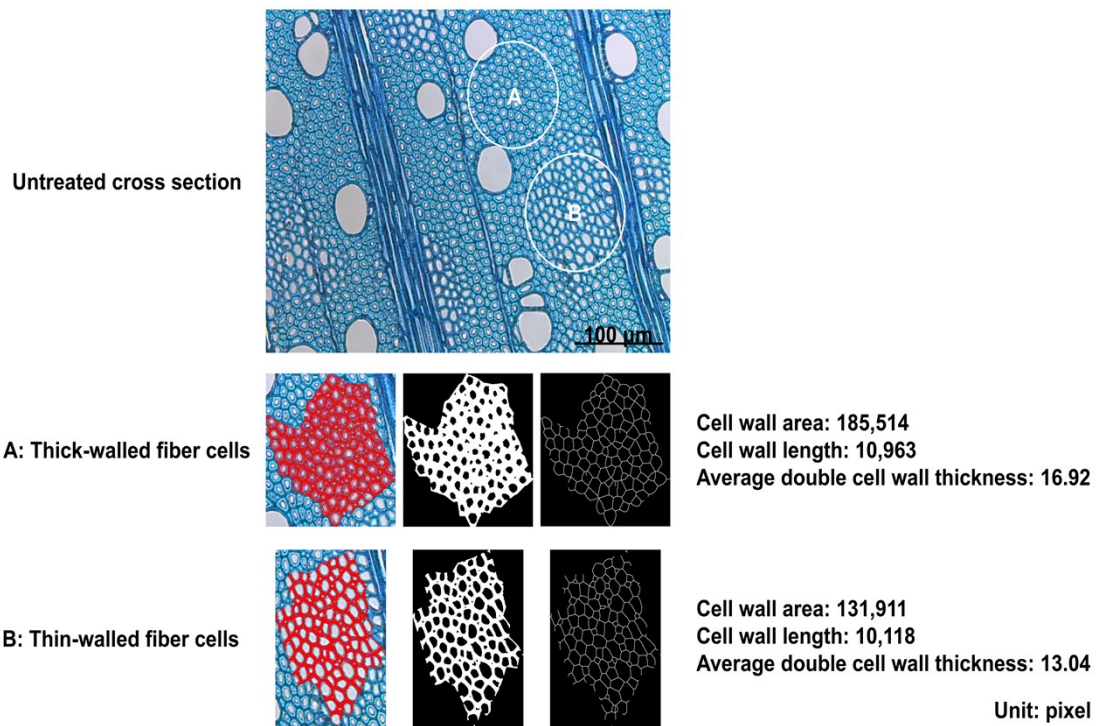

**Fig S1.** LM image analysis for untreated cross section stained with toluidine blue by Image-Pro Plus software. Two regions (Circle A and B) were analysed to measure the cell wall thickness. Double cell wall thickness is the cell wall area divided by the cell wall length.

## Chemical component analysis

The chemical component analysis of untreated and LHW-pretreated sugar maple was performed according to the US National Renewable Energy Laboratory procedures (A. Sluiter, B. Hames, R. Ruiz, C. Scarlata, J. Sluiter, D. Templeton and D. Crocker, *Laboratory analytical procedure*, 2008, **1617**).

**Table S1** Effect of liquid hot water pretreatment on chemical composition of sugar maple.

| Sample no. | Temp. (°C) | Residence time (min) | Solid yield <sup>a</sup> (%) | Chemical composition <sup>a</sup> (%) |      |     |     |     |     |      |     |
|------------|------------|----------------------|------------------------------|---------------------------------------|------|-----|-----|-----|-----|------|-----|
|            |            |                      |                              | Glu                                   | Xyl  | Man | Ara | Gal | Rha | KL   | ASL |
| Untreated  |            |                      |                              | 39.7                                  | 17.8 | 3.4 | 1.0 | 0.9 | 0.7 | 22.4 | 4.1 |
| 1          | 170        | 10                   | 91.6                         | 37.2                                  | 13.9 | 3.1 | 0.9 | 0.8 | 0.6 | 19.5 | 3.8 |
| 2          | 170        | 20                   | 84.1                         | 36.3                                  | 10.7 | 2.7 | 0.7 | 0.8 | 0.6 | 18.9 | 2.9 |
| 3          | 170        | 30                   | 76.2                         | 35.1                                  | 8.2  | 2.9 | 0.5 | 0.7 | 0.4 | 18.1 | 2.3 |
| 4          | 170        | 40                   | 71.4                         | 35.5                                  | 6.1  | 2.2 | 0.5 | 0.4 | 0.5 | 17.9 | 2.1 |

<sup>a</sup> Solid yield and chemical composition were calculated based on the original oven-dry untreated biomass. All the measurements were obtained in triplicate, and the mean value has been indicated. Glu = Glucan, Xyl = Xylan, Man = Mannan, Ara = Arabian, Gal = Galactan, Rha = Rhamnan, KL = Klason lignin, ASL = Acid soluble lignin.
